# Supplementary material
Source: HighWire-hosted journal article supplement (http://www.jneurosci.org/highwire/filestream/600241/field_highwire_adjunct_files/0/Figure_S1.pdf)

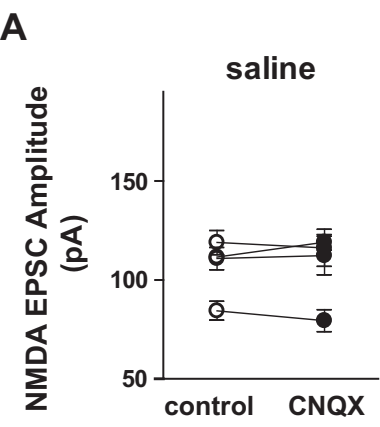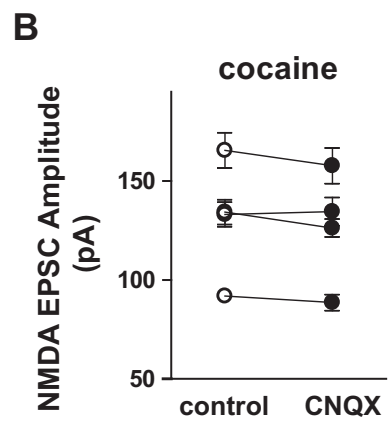

Supplement: Figure_S1.pdf [file Figure_S1.pdf]
